# Supplementary material for: Specific recognition of a target protein, cytochrome c, using molecularly imprinted hydrogels
Source: Royal Society of Chemistry journal article supplement (doi:10.1039/d2tb00501h), 2022-01-01
Supplement: d2tb00501h1.pdf [file d2tb00501h1.pdf]

## Supplementary information

# Specificity recognition for a target protein, cytochrome c using molecularly imprinted hydrogels

Chenchen Liu<sup>1,2</sup>, Takuya Kubo<sup>1,\*</sup> Koji Otsuka<sup>1</sup>

*<sup>1</sup>Department of Material Chemistry, Graduate School of Engineering, Kyoto  
University, Katsura, Nishikyo-ku, Kyoto, 615-8510, Japan.*

*<sup>2</sup>Department of Chemistry, Faculty of Science, Kyushu University, 744 Motoooka,  
Nishi-ku, Fukuoka 819-0395, Japan*

### Table of Contents

Table S1 Compositions of MIP gels with different template-functional monomer ratios.

Table S2 Compositions of MIP gels with different crosslinker lengths.

Table S3 Compositions of MIP gels with different crosslinker ratios.

Table S4 Compositions of the 8% acrylamide gel.

Table S5 Molecular weight and isoelectric point of proteins.

Fig. S1 The adsorption amount of MIP and NIP gels to different proteins when using a protein mixture as sample.

Table S1 Compositions of MIP gels with different template-functional monomer ratios.

| 14G' (μL)         | Cytochrome c (mM) | 10% SA (μL)      | 1 mM tris-HCl (mL) | 20% (w/w) APS (μL) | TEMED (μL) |
|-------------------|-------------------|------------------|--------------------|--------------------|------------|
|                   | 0.03              |                  |                    |                    |            |
|                   | 0.3               |                  |                    |                    |            |
| 214.3<br>(111 mM) | 0.425             | 29.5<br>(6.8 mM) | 3                  | 6                  | 1          |
|                   | 0.68              |                  |                    |                    |            |
|                   | 1.5               |                  |                    |                    |            |

The SA and APS was dissolved into water before use.

Table S2 Compositions of MIP gels with different crosslinker lengths.

| Crosslinker | Crosslinker volume (μL) | Cytochrome c (mM) | 10% SA (μL) | 1 mM tris-HCl (mL) | 20% (w/w) APS (μL) | TEMED (μL) |
|-------------|-------------------------|-------------------|-------------|--------------------|--------------------|------------|
| 9G'         |                         |                   |             |                    |                    |            |
| 14G'        | 214.3                   | 0.297             | 29.5        | 3                  | 6                  | 1          |
| 23G'        | (111 mM)                |                   | (6.8 mM)    |                    |                    |            |

Table S3 Compositions of MIP gels with different crosslinker ratios.

| Crosslinker ratio | 23G' (mg)          | AM-90G (μL)        | Cytochrome c (mM) | 10% SA (μL)      | 1 mM tris-HCl (mL) | TEMED/20% APS (μL) |
|-------------------|--------------------|--------------------|-------------------|------------------|--------------------|--------------------|
| 8/2               | 188.6<br>(88.9 mM) | 42.9<br>(22.2 mM)  |                   |                  |                    |                    |
| 6/4               | 141.4<br>(66.7 mM) | 85.7<br>(44.4 mM)  | 0.297             | 29.5<br>(6.8 mM) | 3                  | 1/6                |
| 4/6               | 94.3<br>(44.4 mM)  | 128.6<br>(66.7 mM) |                   |                  |                    |                    |

Table S4 Compositions of the 8% acrylamide gel.

| 40% acrylamide/bis (mL) | 1 M tris-HCl (μL) | H <sub>2</sub> O (mL) | TEMED/20% APS (μL) |
|-------------------------|-------------------|-----------------------|--------------------|
| 2                       | 10                | 8                     | 2/20               |

Table S5 Molecular weight and isoelectric point of proteins.

| Protein      | Molecular weight (kDa) | Isoelectric point, <i>pI</i> |
|--------------|------------------------|------------------------------|
| Cytochrome c | 12.3                   | 10.2                         |
| Lysozyme     | 14.4                   | 10.8                         |
| Trypsin      | 23.8                   | 10.6                         |
| BSA          | 66.0                   | 4.7                          |

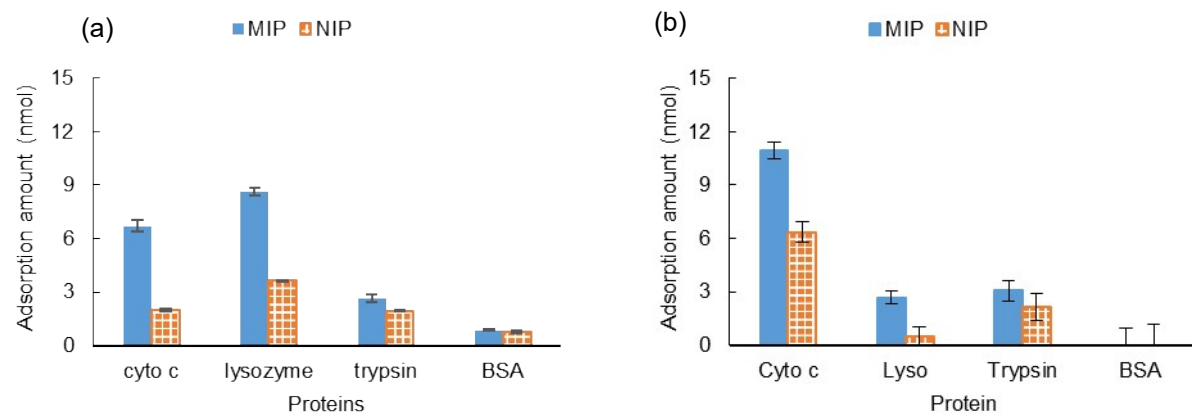

Fig. S1 The adsorption amount of MIP and NIP gels to different proteins when using a protein mixture as sample. (a) 1 mM tris-HCl, 20 mM NaCl and (b) 10 mM HCl as adsorption solution.
